# Supplementary material for: Reactivity of TCNE and TCNQ derivatives of quinonoid zwitterions with Cu(i)
Source: Royal Society of Chemistry journal article supplement (doi:10.1039/c4dt03956d), 2015-01-01
Supplement: c4dt03956d1.pdf [file c4dt03956d1.pdf]

**Electronic supplementary information for DT-ART-12-2014-003956**

**Reactivity of TCNE and TCNQ derivatives of quinonoid zwitterions  
with Cu(I)<sup>†</sup>**

**Thomas Kauf,<sup>a</sup> Vitor Rosa,<sup>a,c</sup> Christophe Fliedel,<sup>a,c</sup> Roberto Pattacini,<sup>a</sup> Naina Deibel,<sup>b</sup> Teresa Avilés,<sup>c</sup>  
Biprajit Sarkar<sup>b</sup> and Pierre Braunstein<sup>a</sup>**

**Content**

**Figure S1.** Cyclic voltammetry of **2**, **3** and **4** in CH<sub>2</sub>Cl<sub>2</sub> / 0.1 M [*n*-Bu<sub>4</sub>N]PF<sub>6</sub>. Reductive side (left) and oxidative side (right).

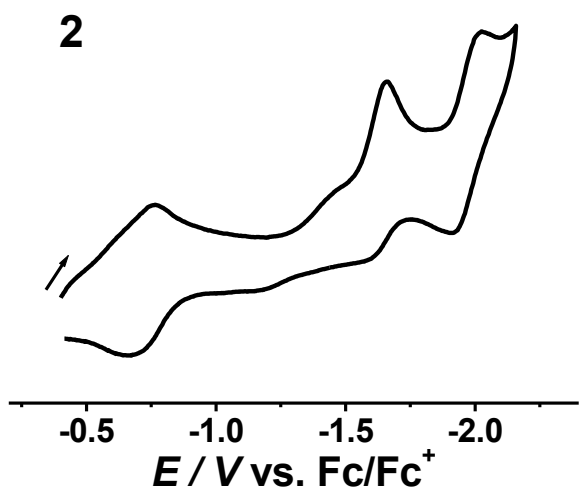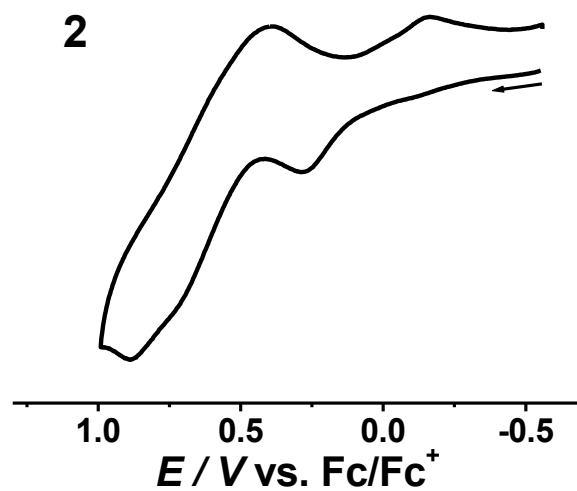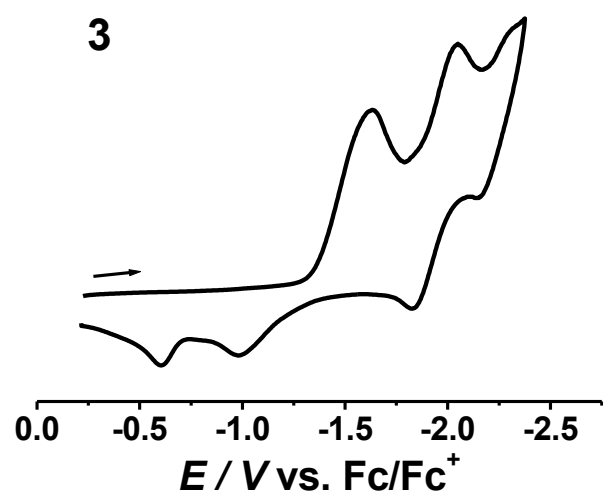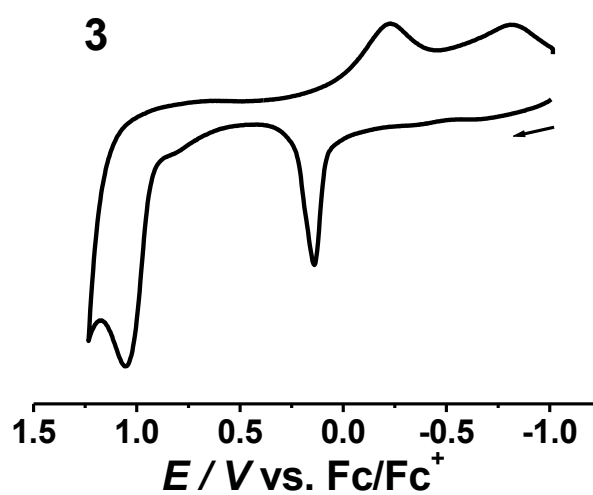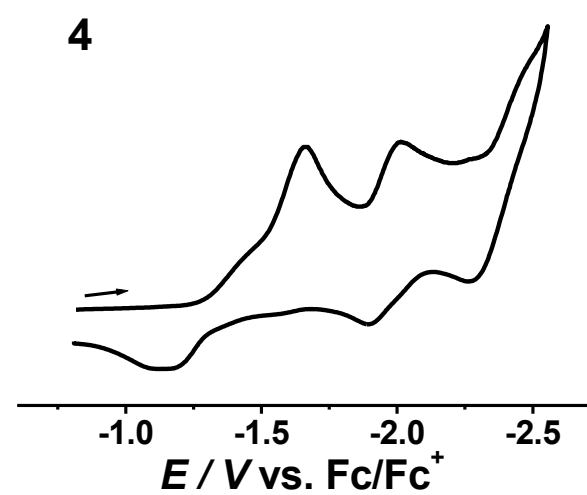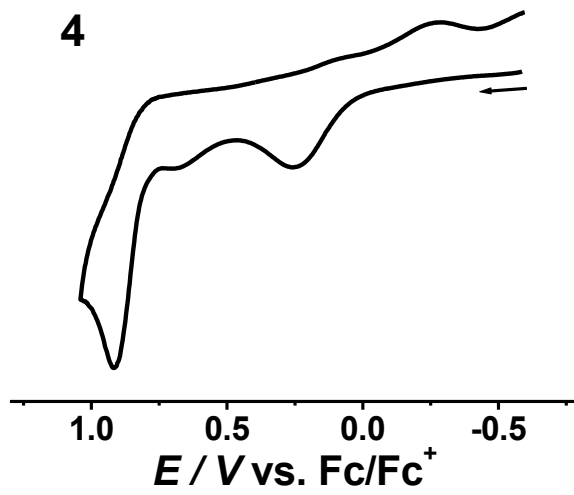

**Figure S1.** Cyclic voltammetry of 2, 3 and 4 in  $\text{CH}_2\text{Cl}_2$  / 0.1 M  $[n\text{-Bu}_4\text{N}]\text{PF}_6$ . Reductive side (left) and oxidative side (right).
